# Supplementary material for: Toward Evaluation in Public Services: Getting Past the Barriers
Source: Atypon-hosted journal article supplement (doi:10.1176/appi.ps.201700096), 2017-11-01
Supplement: appi.ps.201700096.ds001.pdf [file appi.ps.201700096.ds001.pdf]

## "Reasons-Not-To":

## Content, Value Cited, Reply, and Way Forward

| Reason-Not-To               | Content                                                                        | Value Cited                                          | Reply                                                                                     | Way Forward                                                                                        |
|-----------------------------|--------------------------------------------------------------------------------|------------------------------------------------------|-------------------------------------------------------------------------------------------|----------------------------------------------------------------------------------------------------|
| "HIPAA"                     | Can't identify patients/clients                                                | Patient privacy                                      | Evaluation research can be HIPAA-compliant                                                | Get permission or get QI exemption                                                                 |
| "IRB"                       | Need IRB approval                                                              | Rights of human subjects                             | QI is exempt from IRB                                                                     | Consider define as QI project                                                                      |
| "Not my Job "               | Evaluation is outside mission; Lack of resources                               | Mission loyalty                                      | Ethical responsibility to know results                                                    | Start where you're at                                                                              |
| "Evidence-based"            | Don't need evaluation research; we're already doing "evidence-based" treatment | Evaluation science                                   | Individual, not population-based; Data from research centers far from real-world settings | Outcomes-based program evaluation                                                                  |
| "We Just Know What's Right" | A political philosophy, accepted, makes evaluation unnecessary                 | Advantages of less restrictive, community-based care | Virtues of community care do not eliminate need for hospital care; balance needed         | Population-based evaluation of outcomes with varying balances of community-based and hospital care |
| "We Don't Know Enough"      | Evaluation methodology not developed                                           | Evaluation science                                   | Evaluation methods exist, even if at early stage                                          | Use existing knowledge base                                                                        |
| "No Baseline Data"          | Lack of historical data; sometimes, no consensus on metrics                    | Good science needs data                              | Evaluation, even on a small scale, will be worthwhile                                     | Start small, where possible                                                                        |
| "There's Too Much to Do"    | Urgent administrative needs                                                    | Need to set priorities                               | Yes, but...                                                                               | Foster evaluation ethic among parties; start small; evaluate <i>something</i>                      |
